# Supplementary material
Source: PubMed Central journal article supplement (PMC3019625)
Supplement: supp_55_1_291__1.pdf [file supp_55_1_291__1.pdf]

**Supplemental Table I.** *Mtb* Ddl sequence identity to organisms with structures deposited in the protein data bank.

| Organism               | Percent identity to TB Ddl <sup>1</sup> |
|------------------------|-----------------------------------------|
|                        |                                         |
| <i>E. coli</i> Ddla    | 43.0%                                   |
| <i>E. coli</i> Ddlb    | 36.0%                                   |
| <i>T. caldophilus</i>  | 41.0%                                   |
| <i>H. pylori</i>       | 26.0%                                   |
| <i>T. thermophilus</i> | 42.0%                                   |
| <i>S. aureus</i>       | 36.0%                                   |

<sup>1</sup>Output from BlastP, NCBI website (<http://www.ncbi.nlm.nih.gov>). Version 2.2.24 with default algorithm parameters.

797 **Supplemental Figure 1. Intrinsic fluorescence quenching of Ddl.** The y-axis denotes the  
798 difference in fluorescence upon ligand titration with the x-axis denoting ligand concentration.  
799 Data points were recorded ranging from 1 nM to 10 mM for DCS and 1 nM to 5 mM for D-ala.  
800 The curve was fit to model two distinct binding events. A, Apo Ddl affinity for D-ala. B, ATP $\gamma$ S  
801 saturated Ddl affinity for D-ala. C, Apo Ddl affinity for DCS. D, ATP saturated affinity for DCS.

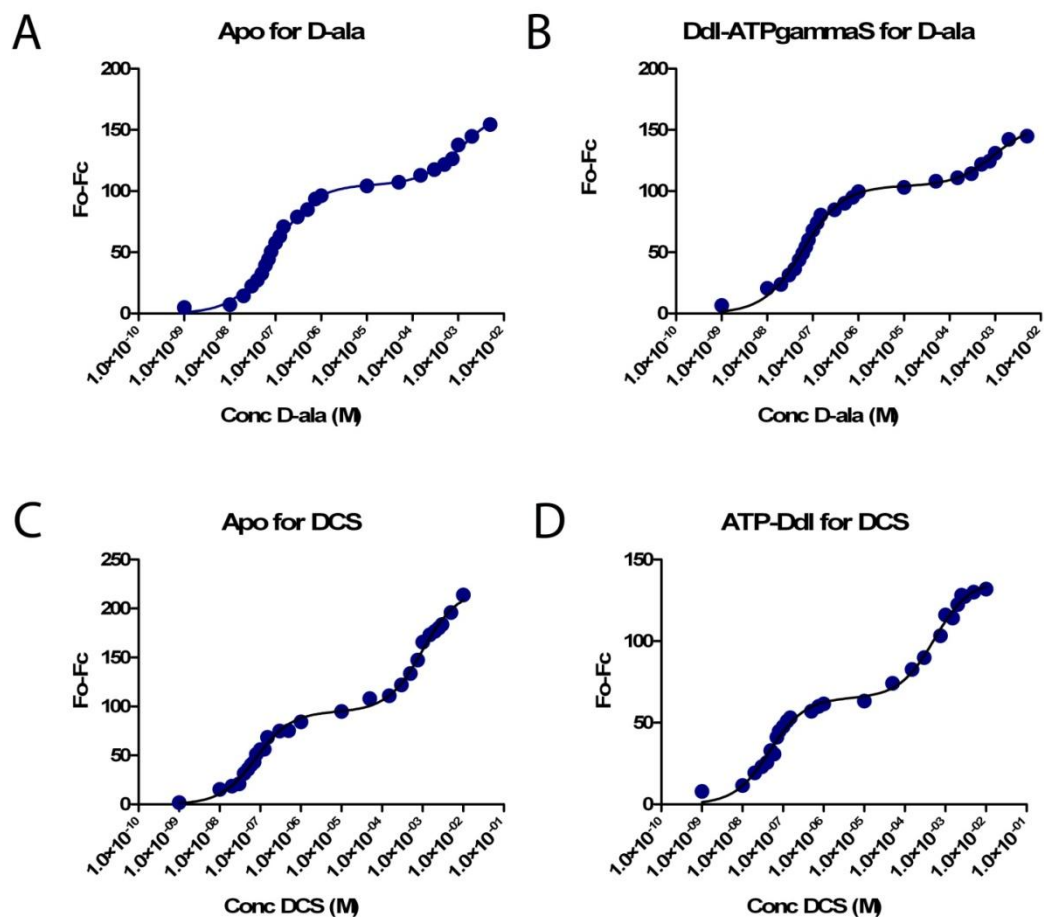

802

803 **Supplemental Figure 2. Isothermal titration calorimetry of Apo Ddl for ATP.** A total of 30  
804 titrations of ATP were injected into apo Ddl. Data was fit using one binding site per monomer.  
805 The data produced a dissociation constant of 14  $\mu$ M.

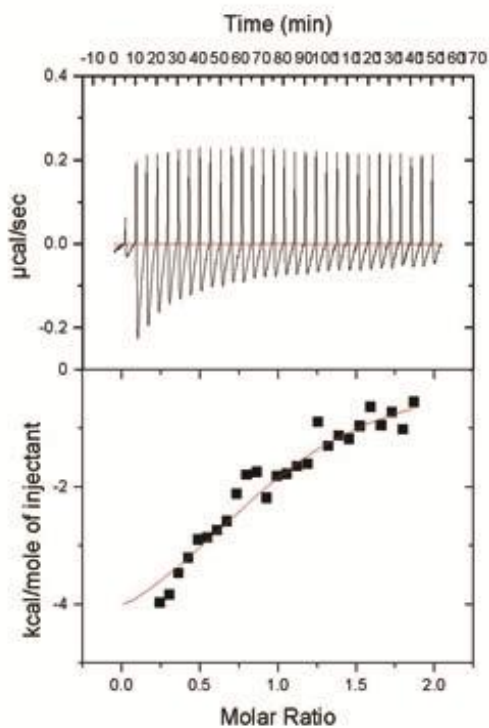

806

807

808

809

810

811

812

813

814 **Supplemental Figure 3. The Ddl ligand binding sites and comparison to other species.** A,  
815 Wire superimposition of *Mtb* Ddl, *E. coli* Ddl (accession code: 2DLN), and *S. aureus* Ddl (PDB  
816 accession code: 2I87) (15, 25). Only monomers (A chain) are depicted. The *Mtb* Ddl is shown in  
817 green, *E. coli* is shown in blue, and *S. aureus* is shown in pink. All species show divergence with  
818 the greatest being in the NTD. The *Mtb* monomer shows markedly higher global conservation to  
819 the *S. aureus* structure. B, Superimposition of the *S. aureus* apo (accession code: 2I87) and  
820 ligand bound forms of Ddl (accession code: 2I8C) (25). The global architecture shows very little  
821 divergence in fold. The apo monomer is shown in green and the ADP bound monomer is  
822 displayed in blue. C, ADP docked into the *Mtb* Ddl active site manually using PDB:2DLN as a  
823 guide (15). The adenine ring is held in place by stacking interactions with Phe192 and Phe320.  
824 Lys24, Asn329, Glu230, Ile233, Ala231, and Lys 194 all form hydrogen bonds with the ADP  
825 molecule. D, The same structure as depicted in panel C with electrostatic interactions with the  
826 phosphate groups highlighted

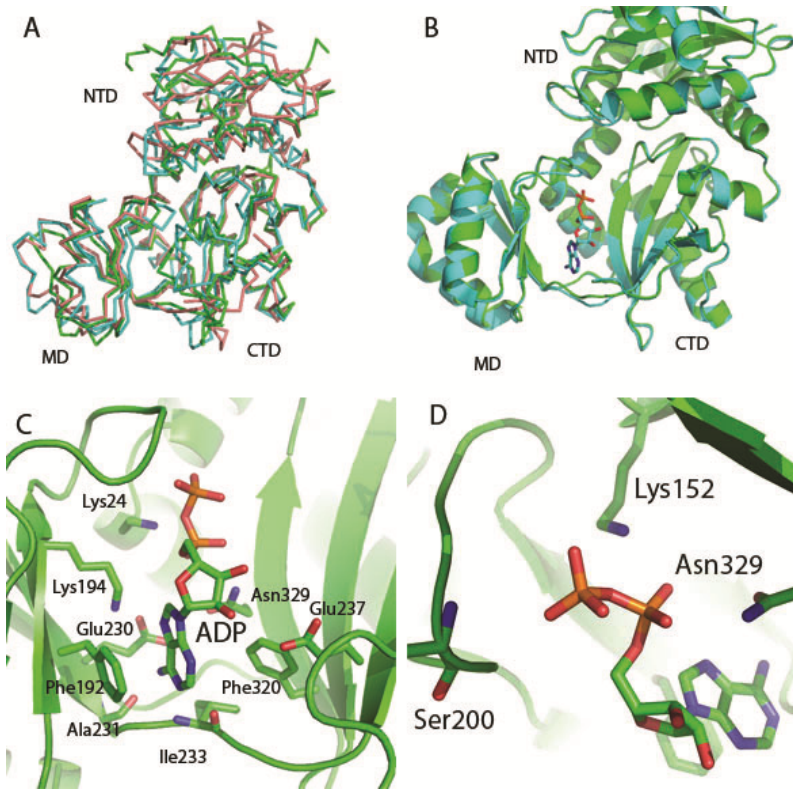

827

828 **Supplemental Figure 4. Multiple Sequence Alignment for Ddl. Protein Sequences.**

829 Alignment of protein sequences from *M. tuberculosis* (labeled *Mtb*), *S. aureus* (labeled SA), and

830 *E. coli* (labeled EC). The *Mtb* specific insertion is highlighted in yellow and conserved catalytic

831 residues are highlighted in green. Results from ClustalW2 analysis (Version 2.0.12).
